# Supplementary figures and images for: Diet-Induced Obesity Impairs Outcomes and Induces Multi-Factorial Deficiencies in Effector T Cell Responses Following Anti-CTLA-4 Combinatorial Immunotherapy in Renal Tumor-Bearing Mice
Source: MDPI journal article supplement (doi:10.3390/cancers13102295), 2021-05-11

A

## Renal tumor weights

OB-RES+NT    DIO+NT  
OB-RES+TX    DIO+TX

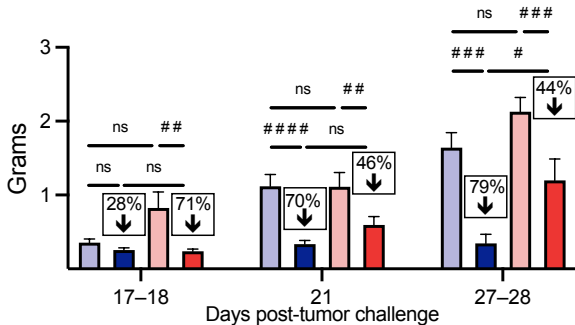

Supplement: s1 [file s1]

A

CD69

(day 17–18 post-tumor)

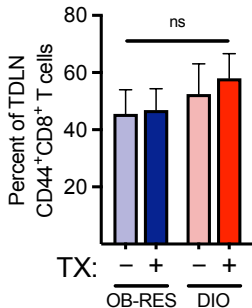

B

CTLA-4

(day 17–18 post-tumor)

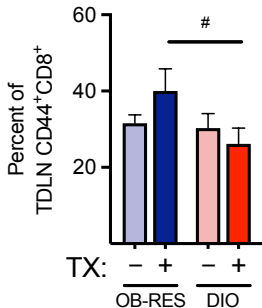

Supplement: s1 [file s1]

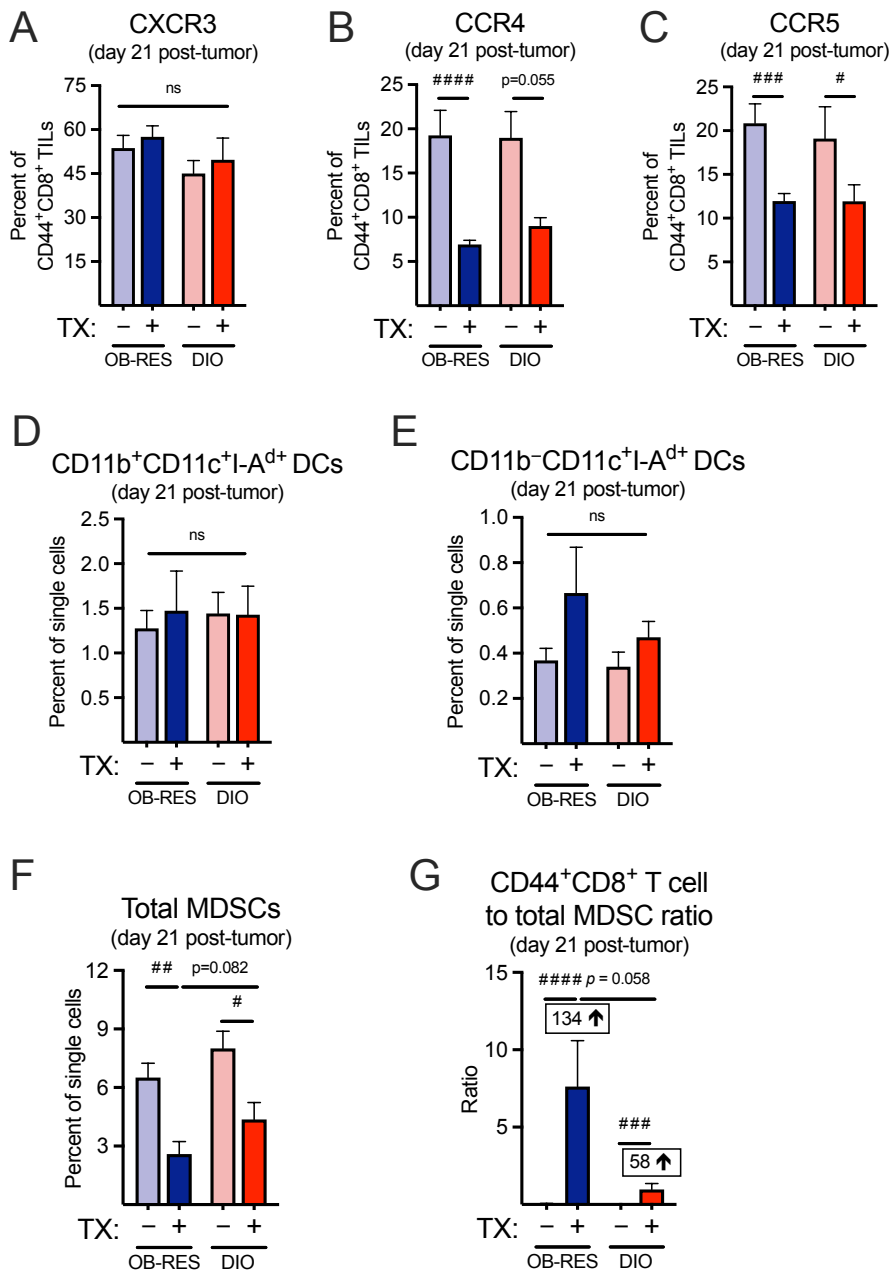

Supplement: s1 [file s1]
